# Supplementary material
Source: publisher figshare collection journal article supplement (https://frontiersin.figshare.com/ndownloader/files/33157976)
Supplement: Supplementary file [file 33157976]

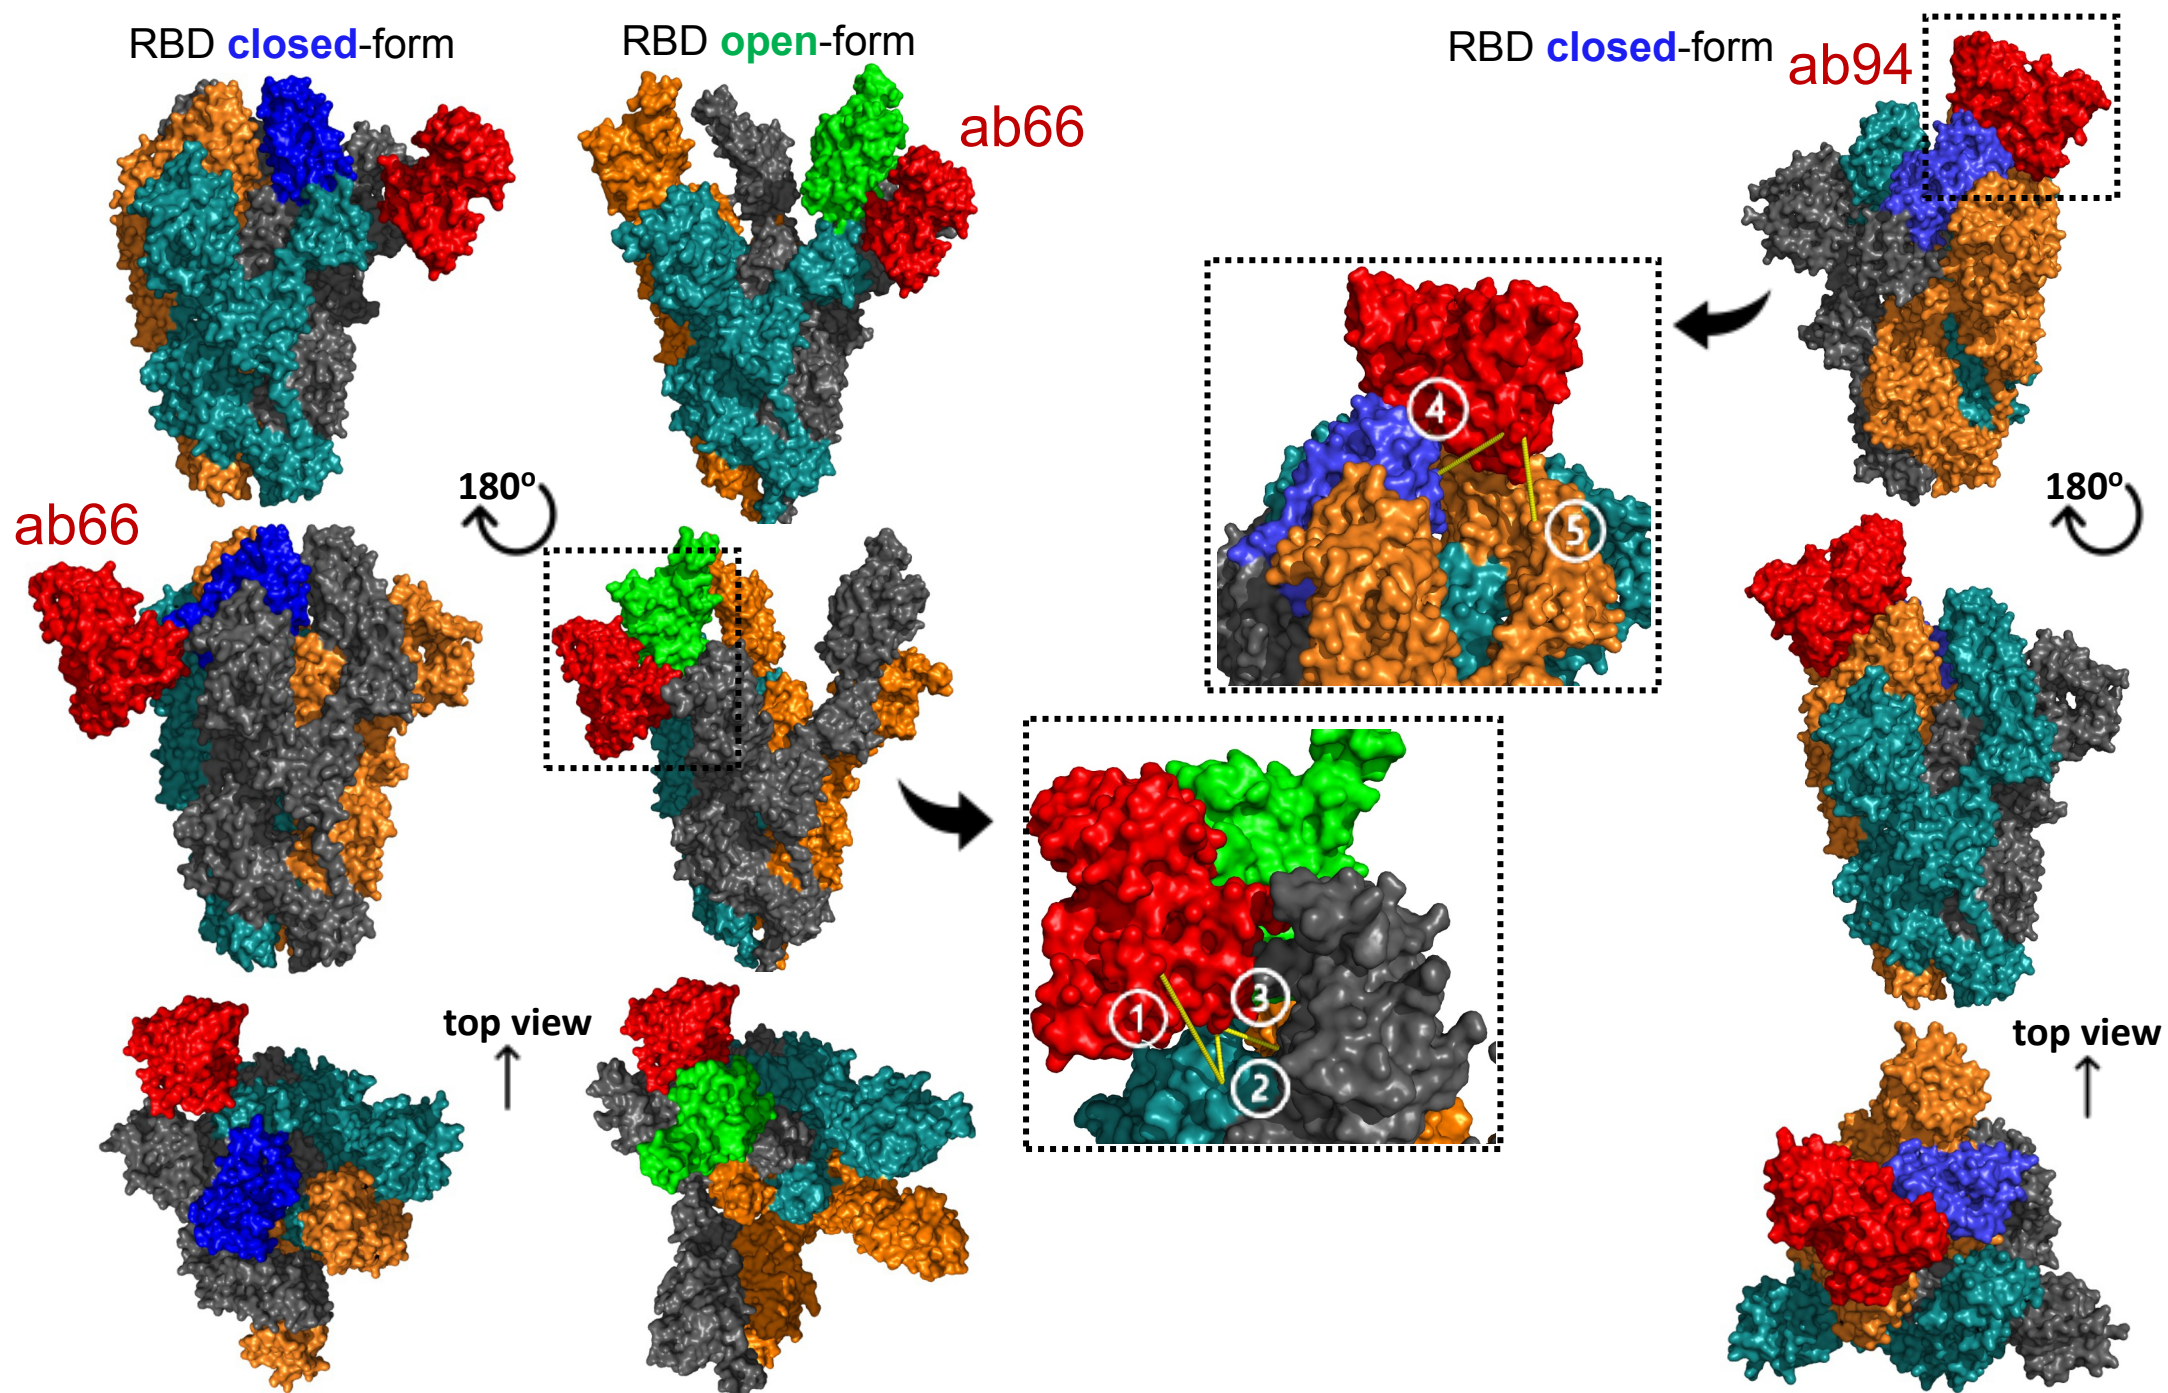

**Supplementary Figure 3.** Ab-Spike XL models highlight RBD binding. Ab66 could be modeled to both the closed and open form of RBD, whereas for Ab94 only models compatible with closed form was found.
